# Supplementary material for: Protein Interaction Networks of Catalytically Active and Catalytically Inactive PqsE in Pseudomonas aeruginosa
Source: PubMed Central journal article supplement (PMC9600345; doi:10.1128/mbio.01559-22), 2022-09-08

a) eGFP-PqsE(WT) interactions in wildtype and  $\Delta rhIR$  *P. aeruginosa*

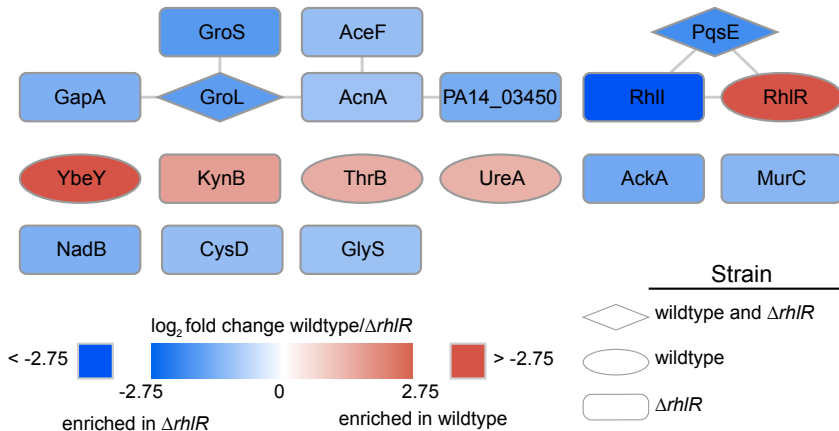

b) eGFP-PqsE(D73A) interactions in wildtype and  $\Delta rhIR$  *P. aeruginosa*

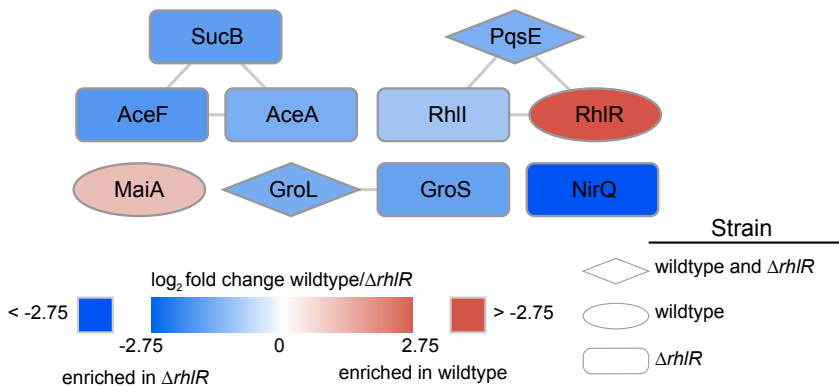

Supplement: mbio.01559-22-s0002.pdf [file mbio.01559-22-s0002.pdf]
