# Supplementary material for: Protein Interaction Networks of Catalytically Active and Catalytically Inactive PqsE in Pseudomonas aeruginosa
Source: PubMed Central journal article supplement (PMC9600345; doi:10.1128/mbio.01559-22), 2022-09-08

a) GFP

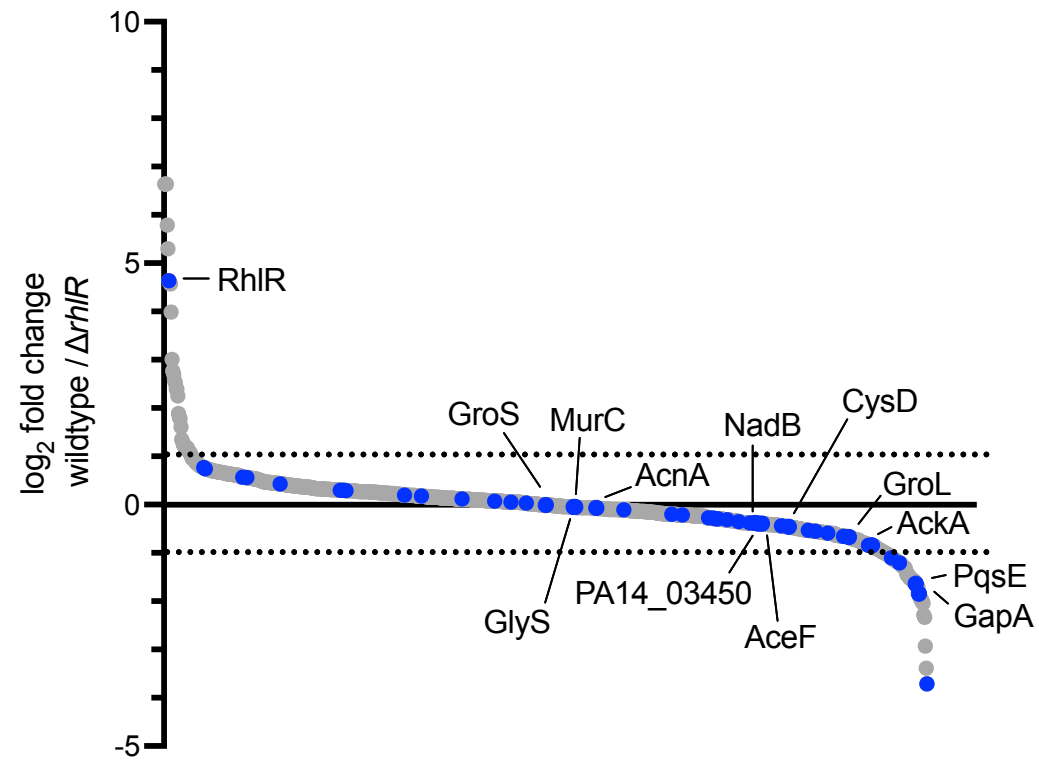

b) PqsE(WT)

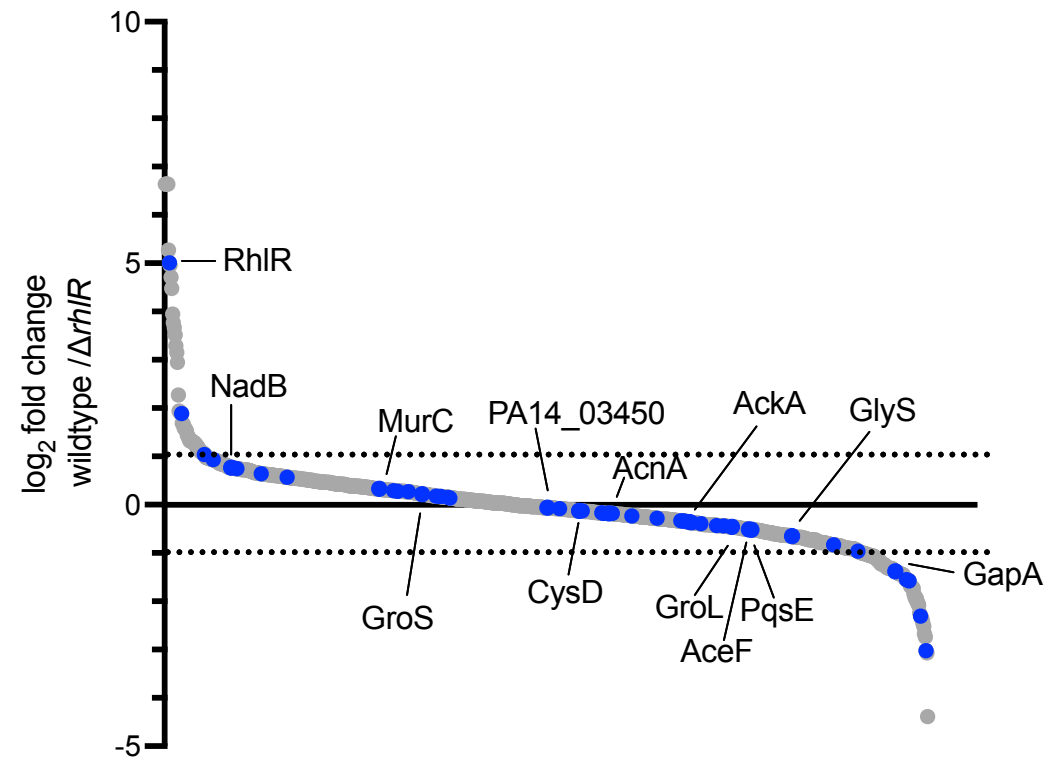

c) PqsE(D73A)

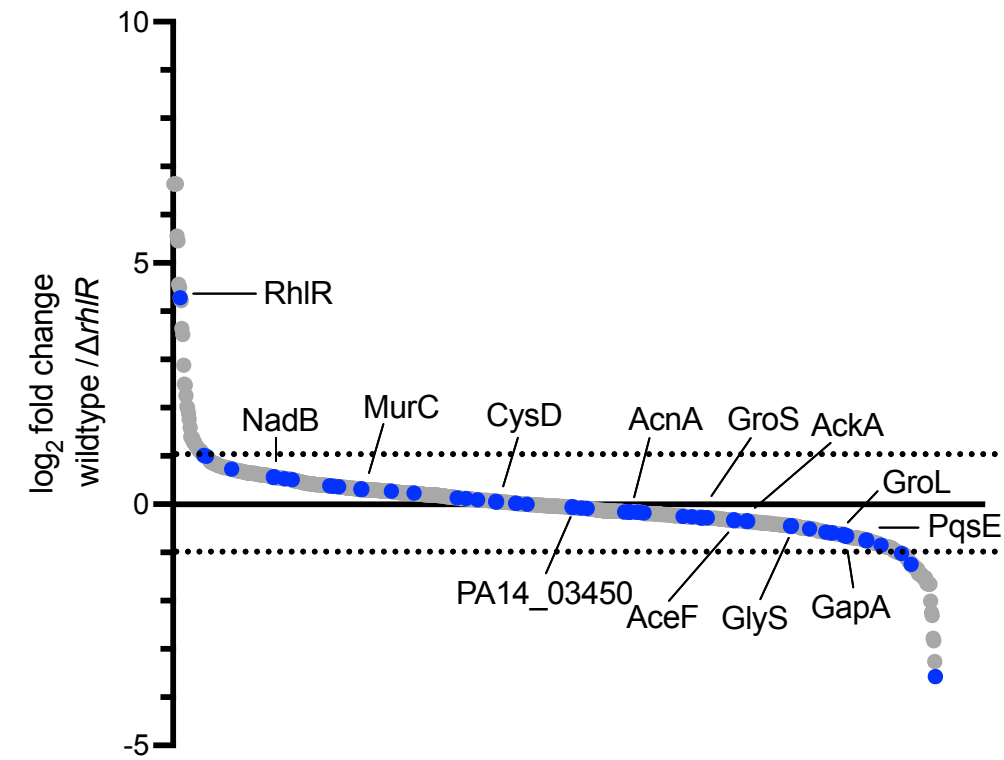

Supplement: mbio.01559-22-s0003.pdf [file mbio.01559-22-s0003.pdf]
